# Supplementary material for: Preparation of zero-thermal-quenching tunable emission bismuth-containing phosphors through the topochemical design of ligand configuration
Source: Royal Society of Chemistry journal article supplement (doi:10.1039/d1qi00705j), 2021-01-01
Supplement: d1qi00705j1.pdf [file d1qi00705j1.pdf]

# Supporting Information

Preparation of zero-thermal-quenching tunable emission bismuth-containing phosphors through topochemical design of ligand configuration

Qincan Ma,<sup>a</sup> Ning Guo,<sup>a,\*</sup> Yanmei Xin,<sup>a</sup> and Baiqi Shao<sup>b</sup>

<sup>a</sup> Department of Chemistry, University of Shanghai for Science and Technology, Shanghai 200093, P. R. China.

<sup>b</sup> State Key Laboratory of Rare Earth Resource Utilization, Changchun Institute of Applied Chemistry, Chinese Academy of Sciences, Changchun 130022, P. R. China.

\*Corresponding author: Tel.: +86-21-65711344; Fax: +86-21-65711344;

E-mail: [guoning@usst.edu.cn](mailto:guoning@usst.edu.cn)

**Figure S1**

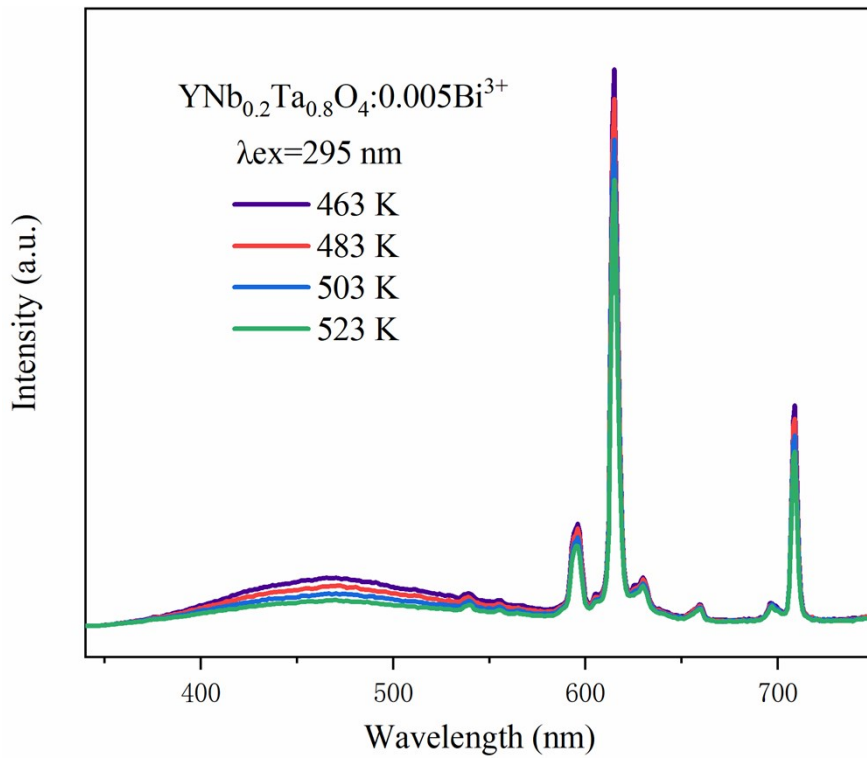

Fig. S1 The PL spectra of Y<sub>0.985</sub>Nb<sub>0.2</sub>Ta<sub>0.8</sub>O<sub>4</sub>:0.005Bi<sup>3+</sup>,0.01Eu<sup>3+</sup> at various temperature.

**Figure S2**

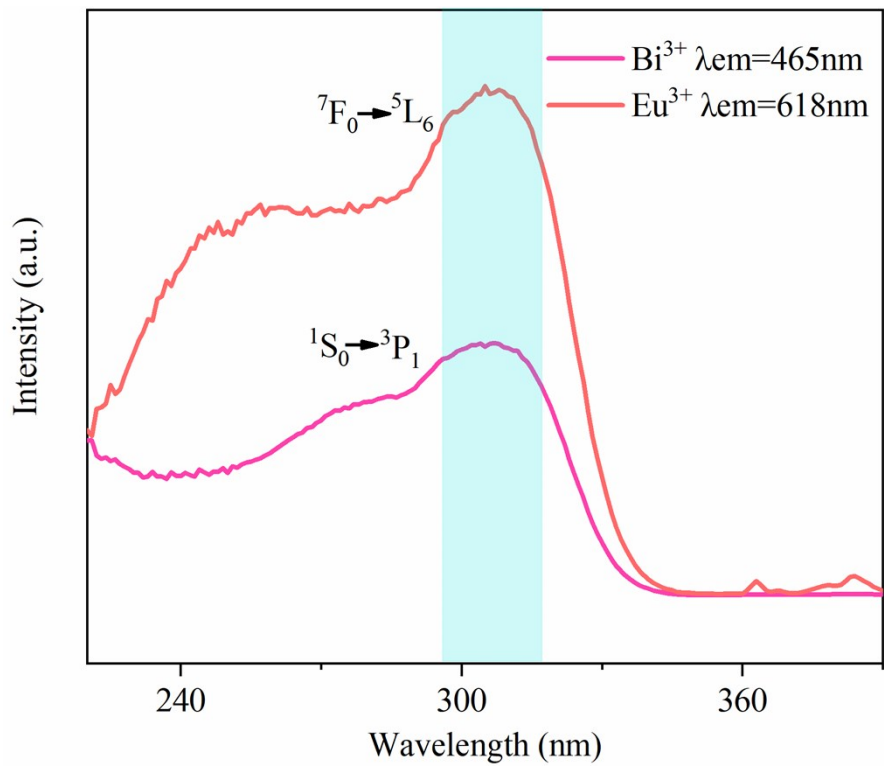

Fig. S2 The PLE spectra of  $\text{YNb}_{0.8}\text{Ta}_{0.2}\text{O}_4:0.005\text{Bi}^{3+},0.01\text{Eu}^{3+}$ .

**Figure S3**

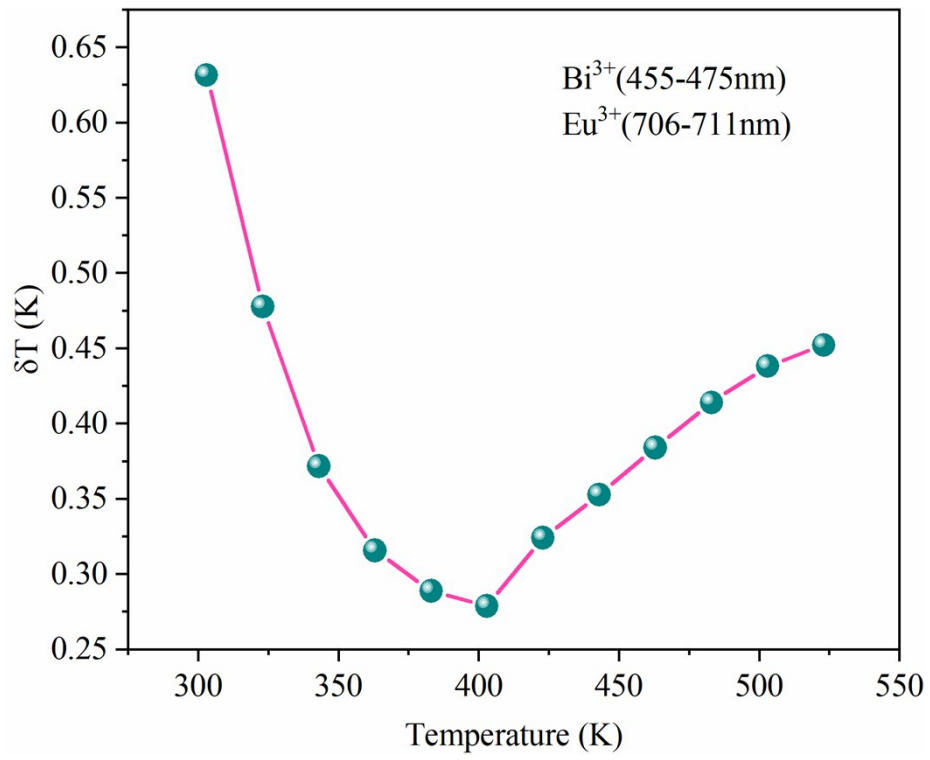

Fig. S3 The temperature resolution of  $\text{YNb}_{0.8}\text{Ta}_{0.2}\text{O}_4:0.005\text{Bi}^{3+},0.01\text{Eu}^{3+}$ .

## Figure Captions

Fig. S1 The PL spectra of  $\text{Y}_{0.985}\text{Nb}_{0.2}\text{Ta}_{0.8}\text{O}_4:0.005\text{Bi}^{3+},0.01\text{Eu}^{3+}$  at various temperature.

Fig. S2 The PLE spectra of  $\text{YNb}_{0.8}\text{Ta}_{0.2}\text{O}_4:0.005\text{Bi}^{3+},0.01\text{Eu}^{3+}$ .

Fig. S3 The temperature resolution of  $\text{YNb}_{0.8}\text{Ta}_{0.2}\text{O}_4:0.005\text{Bi}^{3+},0.01\text{Eu}^{3+}$ .
